# Supplementary material for: Urinary Elimination of Bile Acid Glucuronides under Severe Cholestatic Situations: Contribution of Hepatic and Renal Glucuronidation Reactions
Source: Hindawi journal article supplement (doi:10.1155/2018/8096314), 2018-01-01
Supplement: f1 [file 8096314.f1.pdf]

**Supplementary material 1. Patients with biliary obstruction (adapted from [24]).**

Seventeen patients (8 men and 9 women) with clinical and biochemical features of cholestasis were recruited [24]. In all cases, dilatation of the biliary tree was first confirmed with abdominal ultrasound. Final clinical diagnoses in patients included were as follows: common bile duct stones, 8 patients; pancreatic tumor, 5 patients; bile duct tumor, 1 patient; benign common bile duct stenosis, 1 patient and chronic pancreatitis, 1 patient. The endoscopic retrograde cholangiopancreatography (ERCP) procedure involved placement of plastic 10F stents which were removed or replaced at a median of 5 weeks after initial procedure, depending on the diagnosis.

|                            | Normal<br>Range | Before stenting  | After stenting    |
|----------------------------|-----------------|------------------|-------------------|
| AST (U/L)                  | 5 - 43          | 219.67 ± 36.12   | 33.30 ± 6.28***   |
| ALT (U/L)                  | 5 - 60          | 290.17 ± 55.04   | 44.90 ± 12.03***  |
| AP (U/L)                   | 20 - 140        | 715.23 ± 189.91  | 157.10 ± 23.73*** |
| γGT (U/L)                  | 5 – 80          | 1154.58 ± 225.31 | 238.90 ± 91.74**  |
| Total bilirubin<br>(mg/dl) | 0.1 - 1.2       | 15.06 ± 1.65     | 1.60 ± 0.32***    |

Liver biochemistries were determined before and after an endoscopic stenting of the bile duct. Values represent the mean ± SEM. Statistically significant differences between pre- and post-stenting samples were determined by the Wilcoxon/Mann-Whitney rank-sum test: \*\*:  $p < 0.01$ ; \*\*\*:  $p < 0.001$ . ALT: alanine aminotransferase; AST: aspartate aminotransferase; AP: alkaline phosphatase, γGT: γ-glutamyltranspeptidase.

**Supplementary material 2. Changes in the urine profile of bile acid-glucuronides and in their metabolic ratios before and after a biliary stenting procedure in patients with biliary obstruction (n=12).**

| <i>Urine levels</i>     | Pre-stenting<br>(nM) | Post-stenting<br>(nM) |
|-------------------------|----------------------|-----------------------|
| CDCA-3G                 | 135.2 ± 52.2         | 31.7 ± 8.3*           |
| CDCA-24G                | 1.8 ± 0.2            | 7.3 ± 2.6*            |
| CA-24G                  | 293.1 ± 199.2        | 40.0 ± 12.6           |
| LCA-3G                  | 3.7 ± 1.8            | 13.0 ± 3.3*           |
| LCA-24G                 | 0.3 ± 0.2            | 2.0 ± 0.6**           |
| DCA-3G                  | 22.7 ± 8.7           | 24.2 ± 6.9            |
| DCA-24G                 | 3.0 ± 1.4            | 17.8 ± 3.9**          |
| HDCA-6G                 | 311.7 ± 271.1        | 431.4 ± 120.7         |
| HDCA-24G                | 0.4 ± 0.2            | 0.6 ± 0.3             |
| HCA-6G                  | 3,995.1 ± 2,962.3    | 679.0 ± 162.2         |
| HCA-24G                 | 2.9 ± 0.9            | 0.3 ± 0.1**           |
| <i>Metabolic ratios</i> |                      |                       |
| CDCA-3G/CDCA            | 6.9 ± 1.2            | 4.2 ± 0.8             |
| CDCA-24G/CDCA           | 0.2 ± 0.1            | 1.1 ± 0.3             |
| CA-24G/CA               | 4.4 ± 1.2            | 0.8 ± 0.3**           |
| LCA-3G/LCA              | NA                   | NA                    |
| LCA-24G/LCA             | NA                   | NA                    |
| DCA-3G/DCA              | 4.3 ± 2.8            | 2.1 ± 0.5             |
| DCA-24G/DCA             | 0.7 ± 0.6            | 1.7 ± 0.2             |
| HDCA-6G/HDCA            | 5.0 ± 2.5            | 41.4 ± 11.3           |
| HDCA-24G/HDCA           | 0.0 ± 0.0            | 0.0 ± 0.0             |
| HCA-6G/HCA              | 4,159.1 ± 3,745.9    | 295.4 ± 235.3         |
| HCA-24G/HCA             | 1.5 ± 0.7            | 0.1 ± 0.1             |

Bile acid-glucuronide concentrations are expressed in nM. Values represent the mean ± SEM. The metabolic ratio for each species was calculated as the ratio of glucuronide *versus* unconjugated precursor. Statistically significant differences between pre- and post-stenting

samples were determined by the Wilcoxon matched-pairs signed-ranks test: \*:  $p < 0.05$ ; \*\*:  $p < 0.01$ . CA: cholic acid; CDCA: chenodeoxycholic acid; DCA: deoxycholic acid; HCA: hyocholic acid; HDCA: hyodeoxycholic acid; LCA: lithocholic acid; G: glucuronide. NA: Not applicable due to the previously reported absence of unconjugated LCA in these urine samples [24].
